# Supplementary material for: Quantum dots as a fluorescent labeling tool for live-cell imaging of Leptospira
Source: Royal Society of Chemistry journal article supplement (doi:10.1039/d4nr00543k), 2024-01-01

## Supplementary Information

# Quantum dots as a fluorescent labeling tool for live-cell imaging of *Leptospira*

Yotsakorn Tantiapibalkun<sup>a</sup>, Sapon Nuchpun<sup>a</sup>, Wid Mekseriwattana<sup>b</sup>, Sukhonta Limsampan<sup>c</sup>, Galayanee Douangchawee<sup>d</sup>, Kulachart Jangpatarapongsa<sup>c</sup>, Toemsak Sriksirin<sup>e</sup>, Kanlaya Prapainop Katewongsa<sup>a,e,\*</sup>

<sup>a</sup>Department of Biochemistry, Faculty of Science, Mahidol University, Bangkok, 10400, Thailand.

<sup>b</sup> Department of Chemistry, Faculty of Science, Chulalongkorn University, Bangkok, 10330, Thailand

<sup>c</sup> Center for Research Innovation and Biomedical Informatics, Faculty of Medical Technology, Mahidol University, Nakhon Pathom, 73170, Thailand

<sup>d</sup>Department of Pathobiology, Faculty of Science, Mahidol University, Bangkok, 10400, Thailand

<sup>e</sup> School of Materials Science and Innovation, Faculty of Science, Mahidol University, Bangkok, 10400, Thailand

**Supplementary Figure 1.** The hydrodynamic size in water. (A) CdTe QDs (B) ConA-QDs.

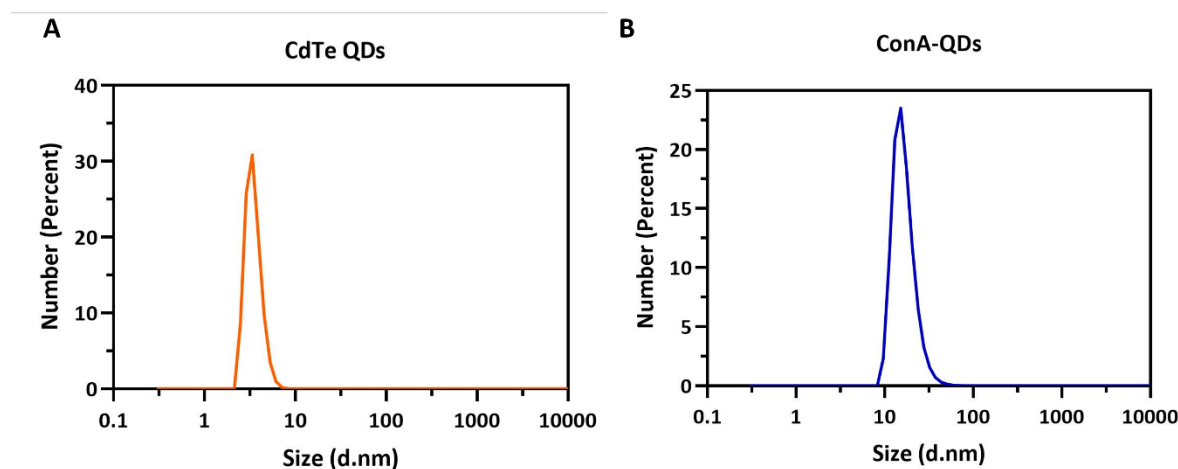

| Sample   | Hydrodynamic size (nm) | PdI | Zeta potential (mV) |
|----------|------------------------|-----|---------------------|
| CdTe QDs | 5.7 ± 4.9              | 1.0 | -6.6                |
| ConA-QDs | 15.6 ± 3.5             | 0.5 | -4.7                |

**Supplementary Figure 2.** Dark-field images of Shermani cells incubated with 100 nM, 300 nM or 600 nM QDs for 0-72 h.

| Incubation time (hour) | Sample (Shermani)                                                                   |                                                                                     |                                                                                       |                                                                                       |                                                                                       |
|------------------------|-------------------------------------------------------------------------------------|-------------------------------------------------------------------------------------|---------------------------------------------------------------------------------------|---------------------------------------------------------------------------------------|---------------------------------------------------------------------------------------|
|                        | QDs 100 nM                                                                          | QDs 300 nM                                                                          | QDs 600 nM                                                                            | Distilled water                                                                       | 10% Clorox                                                                            |
| 0                      |    |    |    |    |    |
| 6                      |    |    |    |    |    |
| 12                     |  |  |  |  |  |

**Supplementary Figure 2.** Dark-field images of Shermani cells incubated with 100 nM, 300 nM or 600 nM QDs for 0-72 h.

| Incubation time (hour) | Sample                                                                              |                                                                                     |                                                                                      |                                                                                       |                                                                                       |
|------------------------|-------------------------------------------------------------------------------------|-------------------------------------------------------------------------------------|--------------------------------------------------------------------------------------|---------------------------------------------------------------------------------------|---------------------------------------------------------------------------------------|
|                        | QDs 100 nM                                                                          | QDs 300 nM                                                                          | QDs 600 nM                                                                           | Distilled water                                                                       | 10% Clorox                                                                            |
| 24                     |    |    |    |    |    |
| 36                     |   |   |   |   |   |
| 48                     |  |  |  |  |  |

**Supplementary Figure 2.** Dark-field images of Shermani cells incubated with 100 nM, 300 nM or 600 nM QDs for 0-72 h.

| Incubation time (hour) | Sample                                                                             |                                                                                    |                                                                                     |                                                                                      |                                                                                      |
|------------------------|------------------------------------------------------------------------------------|------------------------------------------------------------------------------------|-------------------------------------------------------------------------------------|--------------------------------------------------------------------------------------|--------------------------------------------------------------------------------------|
|                        | QDs 100 nM                                                                         | QDs 300 nM                                                                         | QDs 600 nM                                                                          | Distilled water                                                                      | 10% Clorox                                                                           |
| 60                     |   |   |   |   |   |
| 72                     |  |  |  |  |  |

**Supplementary Figure 3** Toxicity effect of MSA-capped CdTe QDs after 72 hrs exposure on each sub-cultured Shermani; Black arrows indicate the cell like a dot spot and sheet plate. The black circles indicate intact bacteria cell. The distilled water and 10% Clorox were used as positive control and negative control, respectively.

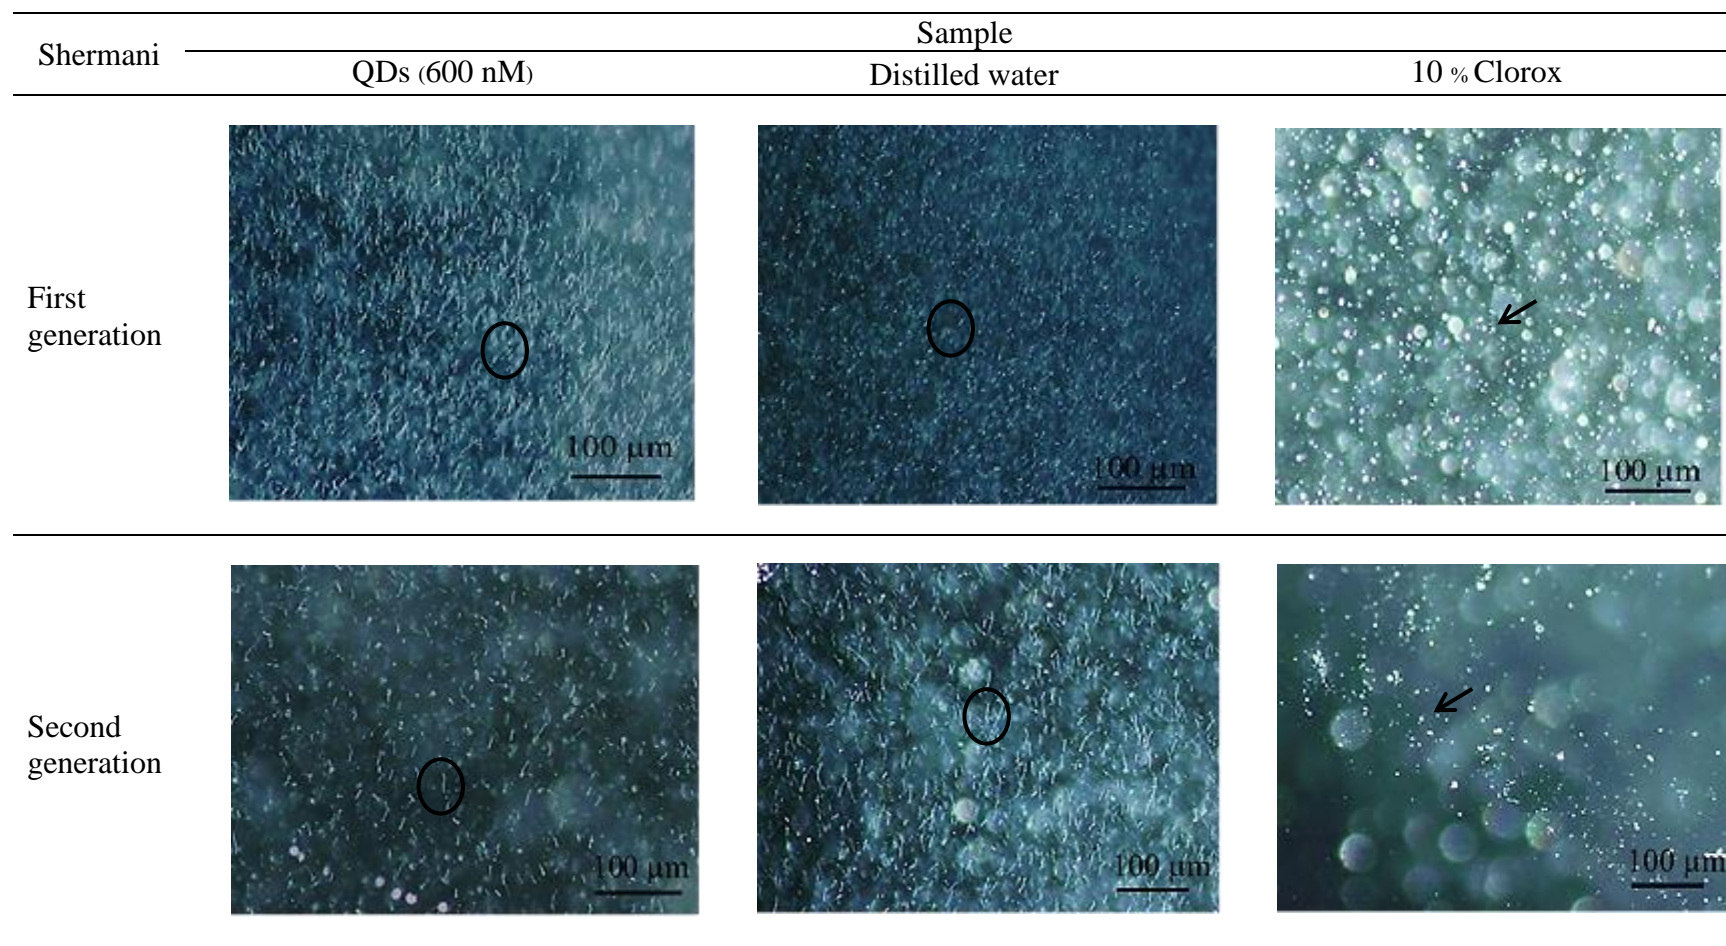

**Supplementary Figure 4.** Determination of cell growth of *L. santarosai* based on O.D. of 420 nm after incubation with different concentrations (0-600 nM) of ConA-QDs.

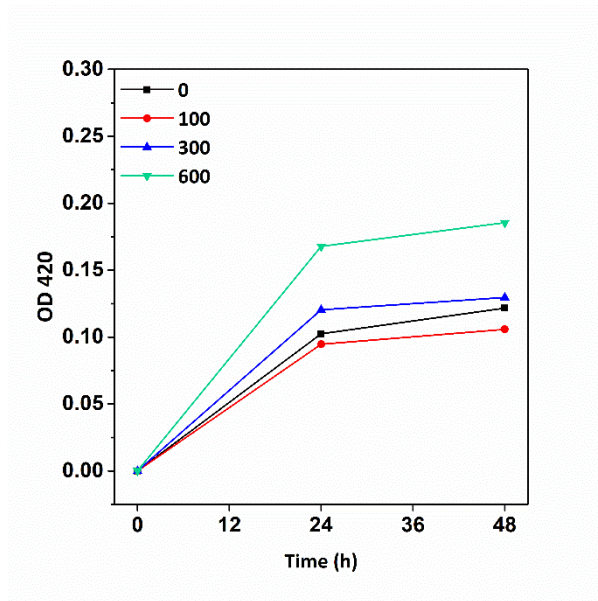

Supplement: d4nr00543k1.pdf [file d4nr00543k1.pdf]
